# Supplementary material for: Metal organic framework-derived transition metal-doped CoSx nanocage for enhanced visible light-assisted methanol electrocatalytic oxidation
Source: Royal Society of Chemistry journal article supplement (doi:10.1039/d3cp03002d), 2023-01-01
Supplement: d3cp03002d1.pdf [file d3cp03002d1.pdf]

# Metal organic frameworks derived transition metal doped $\text{CoS}_x$ nanocage for enhanced visible light assisted methanol electrocatalytic oxidation

Meng Li <sup>a‡</sup>, Quan Du <sup>a‡</sup>, Guanfeng Li <sup>a</sup>, Lei Qian<sup>\*a</sup>, Ying Zeng <sup>a</sup>

<sup>a</sup> College of Materials and Chemistry & Chemical Engineering, Chengdu University  
of Technology. Chengdu, Sichuan, 610059, China

\* Corresponding authors. [qianlei13@cdut.cn](mailto:qianlei13@cdut.cn);

‡ These authors contributed equally to this work.

## Supporting Information

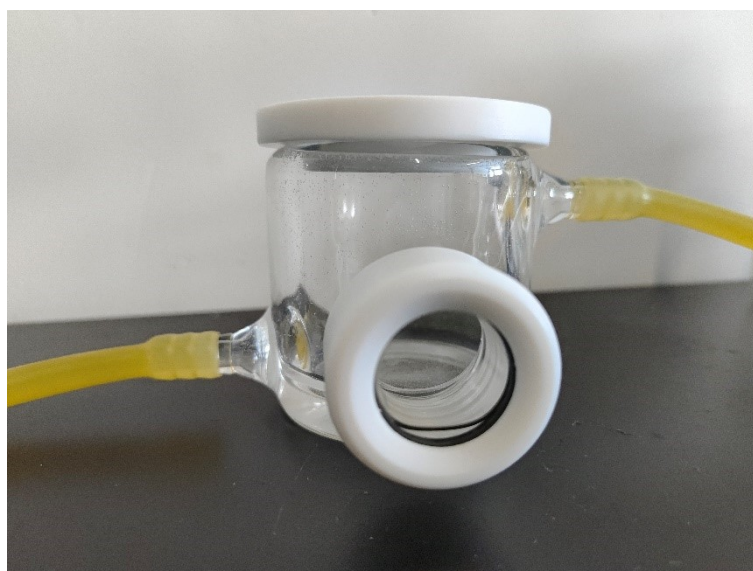

Figure S1 The photograph of double-layer electrochemical cell with recirculating water.

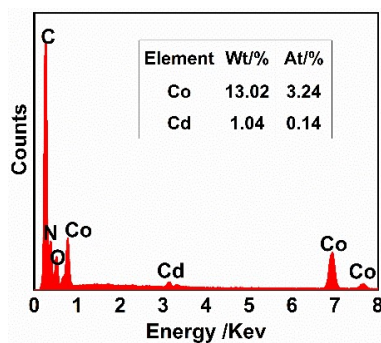

Figure S2 The EDS spectrum of Cd-ZIF-67

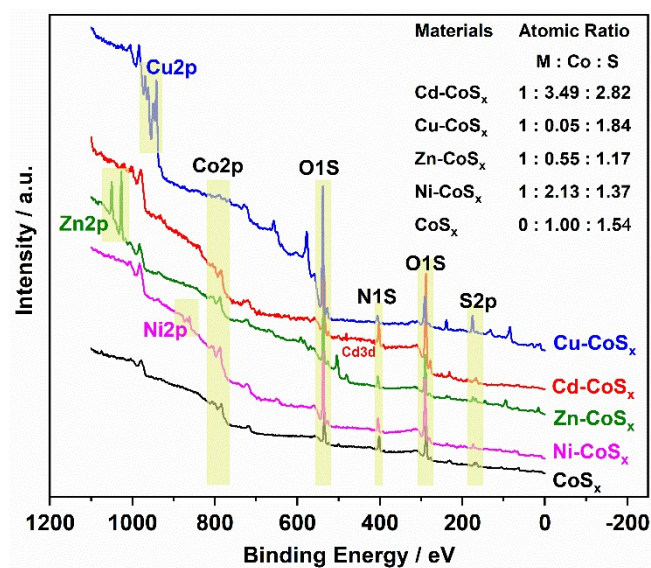

Figure S3 The XPS survey spectra and the atomic ratio of Cu-CoS<sub>x</sub>, Zn-CoS<sub>x</sub>, Ni-CoS<sub>x</sub> and undoped CoS<sub>x</sub>.

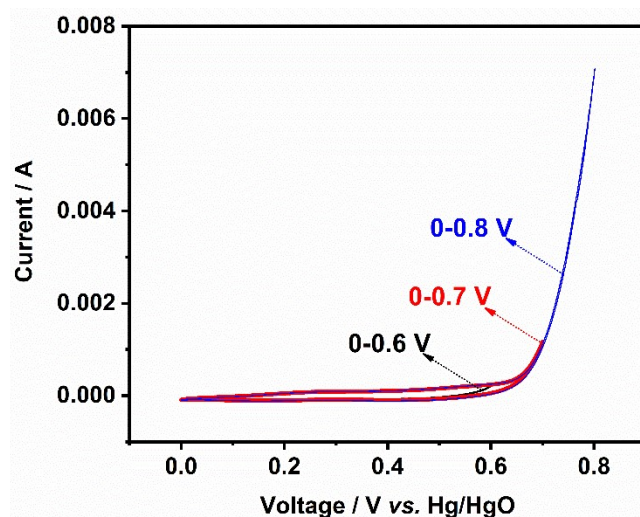

Figure S4 The CV curves of Cd-CoS<sub>x</sub> in 1 M KOH at scan rate of 10 mV s<sup>-1</sup>.

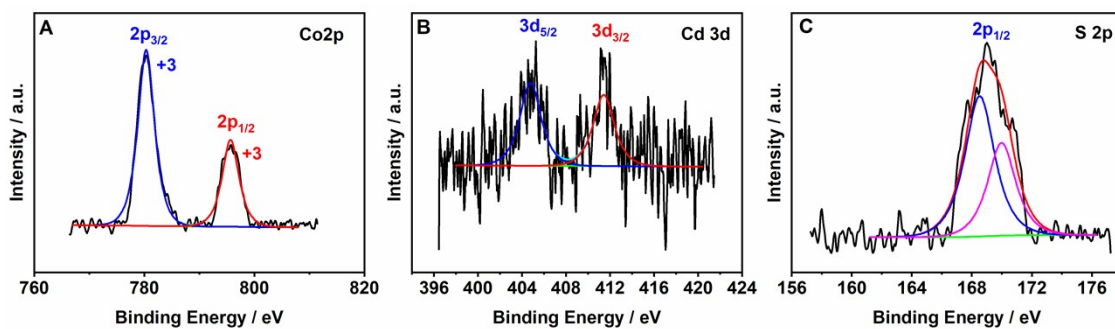

Figure S5 The high-resolution XPS spectra of Co 2p (A), Ni 3d (B) and S 2p (C) of Cd-CoS<sub>x</sub> after reaction.

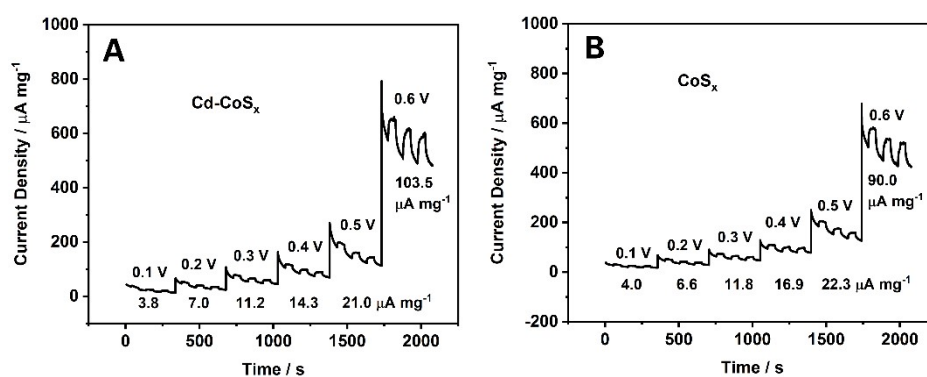

Figure S6 The photoresponse curves of Cd-CoS<sub>x</sub> (A) and CoS<sub>x</sub> (B) at different potential and the photoresponse current density, the electrolyte was 1 M KOH.

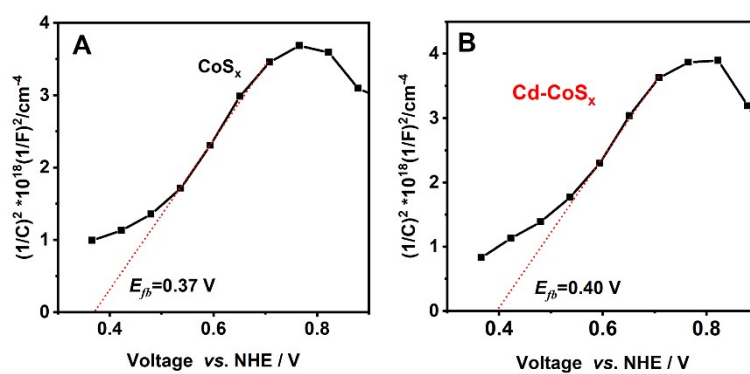

Figure S7 The Mott-Schottky plots of CoS<sub>x</sub> and Cd-CoS<sub>x</sub>.
